# Supplementary material for: Incidence and Predictors of Atrial Fibrillation Progression
Source: PubMed Central journal article supplement — J Am Heart Assoc. 2019 Oct 8;8(20):e012554. doi: 10.1161/JAHA.119.012554 (PMC6818023; doi:10.1161/jaha.119.012554), 2019-10-08
Supplement: JAH3-8-e012554-s001.pdf [file JAH3-8-e012554-s001.pdf]

# **Supplemental Material**

## Appendix

### Swiss-AF Investigators and Contributors

University Hospital Basel/Basel University: Stefanie Aeschbacher, Steffen Blum, Leo Bonati, Lorin Fröhlich, Rebecca Gugganig, Thomas Kofler, Philipp Krisai, Christine Meyer-Zürn, Pascal Meyre, Andreas U. Monsch, Christian Müller, Christiane Pudenz, Philipp Reddiess, Javier Ruperti Repilado, Aleksandra Schweizer, Anne Springer, Fabienne Steiner, Samuel Stempfel, Christian Sticherling, Thomas Szucs, Jan van der Stouwe, Gian Voellmin, Leon Zwimpfer. Local Principal Investigator: Michael Kühne; Principal Investigators: Stefan Osswald, David Conen

University Hospital Bern: Faculty: Drahomir Aujesky, Urs Fischer, Juerg Fuhrer, Laurent Roten, Simon Jung, Heinrich Mattle; Research fellows: Luise Adam, Carole Elodie Aubert, Martin Feller, Claudio Schneider, Axel Loewe, Elisavet Moutzouri; Study nurses: Tanja Flückiger, Cindy Groen, Nathalie Schwab. Local Principal Investigator: Nicolas Rodondi

Stadtspital Triemli Zurich: Christopher Beynon, Roger Dillier, Franz Eberli, Simone Fontana, Christine Franzini, Isabel Juchli, Claudia Liedtke, Jacqueline Nadler, Thayze Obst, Noreen Tynan, Xiaoye Schneider, Katrin Studerus, Dominik Weishaupt. Local Principal Investigator: Andreas Müller

Kantonsspital Baden: Silke Kuest, Karin Scheuch, Denise Hischier, Nicole Bonetti, Corina Bello, Henriette Isberg, Alexandra Grau, Jonas Villinger, Mary-Monica Papaux, Eva Laube, Philipp Baumgartner, Mark Filipovic, Marcel Frick, Stefanie Leuenberger. Local Principal Investigator: Jürg H. Beer

Cardiocentro Lugano: Angelo Auricchio, Adriana Anesini, Cristina Camporini, Giulio Conte, Maria Luce Caputo, Francois Regoli, Tiziano Moccetti. Local Principal Investigator: Tiziano Moccetti

Kantonsspital St. Gallen: Roman Brenner, David Altmann, Manuela Forrer, Michaela Gemperle. Local Principal Investigator: Peter Ammann

Hôpital Cantonal Fribourg: Mathieu Firmann, Sandrine Foucras. Local Principal Investigator: Daniel Hayoz

Luzerner Kantonsspital: Benjamin Berte, Andrea Kaeppli, Myriam Roth, Brigitta Mehmman, Markus Pfeiffer, Ian Russi, Kai Schmidt, Vanessa Weberndoerfer, Mabelle Young, Melanie Zbinden; Local Principal Investigator: Richard Kobza

Ente Ospedaliero Cantonale Lugano: Luisa Vicari, Jane Frangi-Kultalahti, Tatiana Terrot. Local Principal Investigator: Giorgio Moschovitis

University Hospital Geneva: Georg Ehret, Hervé Gallet, Elise Guillermet, Francois Lazeyras, Karl-Olof Lovblad, Patrick Perret, Cheryl Teres. Local Principal Investigator: Dipen Shah

University Hospital Lausanne: Nathalie Lauriers, Marie Méan, Sandrine Salzmman. Local Principal Investigator: Jürg Schläpfer

Bürgerspital Solothurn: Nisha Arenja, Andrea Grêt, Sandra Vitelli. Local Principal Investigator: Jan Novak

Ente Ospedaliero Cantonale Bellinzona: Jane Frangi, Augusto Gallino. Local Principal Investigator: Marcello Di Valentino

St. Anna Spital Luzern: Renate Schoenenberger-Berzins.

University of Zurich/University Hospital Zurich: Fabienne Witassek, Matthias Schwenkglenks, Christoph Stippich

Medical Image Analysis Center AG Basel: Ernst-Wilhelm Radue, Tim Sinnecker, Jens Würfel

Clinical Trial Unit Basel: Pascal Benkert, Thomas Fabbro, Patrick Simon, Michael Coslovsky

Schiller AG Baar: Ramun Schmid

**Table S1 Incidence models.**

| <b>Outcome</b>                                                                     | <b>No. of events</b> | <b>py of follow-up</b> | <b>incidence per 100py</b> |
|------------------------------------------------------------------------------------|----------------------|------------------------|----------------------------|
| clinical AF progression                                                            | 458                  | 8866                   | 5.2                        |
| clinical AF progression from paroxysmal AF                                         | 294                  | 6031                   | 4.9                        |
| clinical AF progression from persistent AF                                         | 164                  | 2835                   | 5.8                        |
| clinical AF progression among patients without a history of ECV or PVI at baseline | 151                  | 2772                   | 5.4                        |
| RCI                                                                                | 617                  | 5663                   | 10.9                       |
| Newly prescribed amiodarone                                                        | 199                  | 7148                   | 2.8                        |
| ECV                                                                                | 282                  | 6759                   | 4.2                        |
| PVI                                                                                | 358                  | 6327                   | 5.7                        |
| RCI among patients without a history of PVI or ECV                                 | 258                  | 3207                   | 8.0                        |

AF=atrial fibrillation; py=patient years; ECV=electrical cardioversion; PVI=pulmonary vein isolation;  
RCI=rhythm control intervention

**Table S2. Risk factors for clinical atrial fibrillation progression in paroxysmal vs. persistent atrial fibrillation.**

| Characteristic                      | Paroxysmal         | p-value | Persistent         | p-value | p-interaction |
|-------------------------------------|--------------------|---------|--------------------|---------|---------------|
|                                     | multivariable adj. |         | multivariable adj. |         |               |
| Age                                 | 1.14 [1.06; 1.22]  | <0.001  | 1.31 [1.17; 1.45]  | <0.001  | 0.029         |
| Female Sex                          | 0.84 [0.64; 1.10]  | 0.207   | 0.98 [0.68; 1.42]  | 0.908   | 0.537         |
| BMI                                 | 1.03 [1.00; 1.05]  | 0.052   | 1.03 [0.99; 1.06]  | 0.181   | 0.966         |
| Heart rate                          | 1.07 [1.04; 1.11]  | <0.001  | 1.02 [0.98; 1.07]  | 0.290   | 0.102         |
| Systolic blood pressure             | 1.02 [0.99; 1.05]  | 0.233   | 1.04 [1.00; 1.09]  | 0.065   | 0.475         |
| History of diabetes                 | 0.84 [0.58; 1.21]  | 0.341   | 1.11 [0.71; 1.72]  | 0.650   | 0.329         |
| History of coronary artery disease  | 0.99 [0.73; 1.32]  | 0.918   | 0.98 [0.66; 1.45]  | 0.913   | 0.968         |
| History of hypertension             | 0.91 [0.69; 1.21]  | 0.255   | 1.09 [0.74; 1.62]  | 0.667   | 0.468         |
| History of stroke and/or TIA        | 1.46 [1.09; 1.94]  | 0.010   | 1.54 [1.05; 2.27]  | 0.027   | 0.778         |
| History of heart failure            | 2.07 [1.53; 2.80]  | <0.001  | 1.24 [0.86; 1.78]  | 0.251   | 0.033         |
| History of hyperthyroidism          | 1.92 [1.11; 3.31]  | 0.020   | 1.49 [0.85; 2.61]  | 0.162   | 0.556         |
| History of renal failure            | 1.17 [0.83; 1.63]  | 0.375   | 1.03 [0.68; 1.58]  | 0.885   | 0.662         |
| Regular physical activity           | 0.81 [0.63; 1.03]  | 0.084   | 0.80 [0.58; 1.12]  | 0.189   | 0.986         |
| Current smoking                     | 1.07 [0.69; 1.66]  | 0.775   | 0.97 [0.52; 1.84]  | 0.936   | 0.804         |
| History of pulmonary vein isolation | 0.87 [0.64; 1.20]  | 0.405   | 0.44 [0.26; 0.73]  | 0.002   | 0.026         |
| AF related symptoms at baseline     | 0.95 [0.71; 1.25]  | 0.693   | 0.78 [0.55; 1.09]  | 0.148   | 0.390         |
| Amiodarone use at baseline          | 0.99 [0.73; 1.36]  | 0.970   | 0.76 [0.51; 1.13]  | 0.169   | 0.289         |

Data are hazard ratios (HR) (95% confidence intervals [CI]) based on Cox regression models. Age per 5 years increase; Heart Rate per 5 beats/min increase, Systolic blood pressure per 5mmHg increase; Models included all variables from the table (age, sex, BMI, heart rate, systolic blood pressure, history of diabetes, history of coronary artery disease, history of hypertension, history of stroke/TIA, history of heart failure, history of hyperthyroidism, history of renal failure, regular physical activity, current smoking, history of pulmonary vein isolation, AF related symptoms, amiodarone).

A maximum of 85 (3.0%) observations were deleted due to missing variables.

**Table S3. Risk factors for clinical atrial fibrillation progression in BEAT-AF vs. Swiss-AF.**

| Characteristic                      | BEAT-AF            | p-value | Swiss-AF           | p-value |
|-------------------------------------|--------------------|---------|--------------------|---------|
|                                     | multivariable adj. |         | multivariable adj. |         |
| Age                                 | 1.22 [1.12; 1.33]  | <0.001  | 1.09 [1.00; 1.18]  | 0.063   |
| Female Sex                          | 0.83 [0.59; 1.16]  | 0.270   | 0.87 [0.66; 1.16]  | 0.355   |
| BMI                                 | 1.02 [0.99; 1.06]  | 0.216   | 1.01 [0.98; 1.04]  | 0.458   |
| Heart rate                          | 1.01 [0.97; 1.05]  | 0.619   | 1.12 [1.08; 1.16]  | <0.001  |
| Systolic blood pressure             | 1.04 [1.00; 1.09]  | 0.069   | 1.01 [0.98; 1.05]  | 0.421   |
| History of diabetes                 | 0.80 [0.48; 1.33]  | 0.382   | 0.83 [0.59; 1.17]  | 0.282   |
| History of coronary artery disease  | 1.06 [0.71; 1.58]  | 0.763   | 0.92 [0.69; 1.23]  | 0.558   |
| History of hypertension             | 0.87 [0.61; 1.23]  | 0.414   | 1.10 [0.81; 1.49]  | 0.536   |
| History of stroke and/or TIA        | 1.12 [0.72; 1.72]  | 0.620   | 1.42 [1.08; 1.88]  | 0.012   |
| History of heart failure            | 2.28 [1.56; 3.34]  | <0.001  | 1.37 [1.03; 1.82]  | 0.032   |
| History of hyperthyroidism          | 2.72 [1.61; 4.60]  | <0.001  | 1.08 [0.59; 2.00]  | 0.800   |
| History of renal failure            | 0.66 [0.40; 1.10]  | 0.112   | 1.31 [0.97; 1.78]  | 0.081   |
| Regular physical activity           | 0.74 [0.54; 1.00]  | 0.051   | 0.87 [0.67; 1.12]  | 0.263   |
| Current smoking                     | 1.00 [0.56; 1.80]  | 0.999   | 1.03 [0.65; 1.64]  | 0.902   |
| Paroxysmal AF at baseline           | 0.86 [0.61; 1.20]  | 0.367   | 1.27 [0.97; 1.65]  | 0.077   |
| History of pulmonary vein isolation | 0.86 [0.59; 1.25]  | 0.432   | 0.45 [0.31; 0.68]  | <0.001  |
| AF related symptoms at baseline     | 1.12 [0.76; 1.65]  | 0.565   | 0.78 [0.60; 1.02]  | 0.068   |
| Amiodarone use at baseline          | 0.92 [0.63; 1.35]  | 0.669   | 0.94 [0.69; 1.30]  | 0.713   |

Data are hazard ratios (HR) (95% confidence intervals [CI]) based on Cox regression models. Age per 5 years increase; Heart Rate per 5 beats/min increase, Systolic blood pressure per 5mmHg increase; Models included all variables from the table (age, sex, BMI, heart rate, systolic blood pressure, history of diabetes, history of coronary artery disease, history of hypertension, history of stroke/TIA, history of heart failure, history of hyperthyroidism, history of renal failure, regular physical activity, current smoking, AF type, history of pulmonary vein isolation, AF related symptoms, amiodarone). A maximum of 33 (2.8%) [BEAT-AF] and 52 (3.1%) [Swiss-AF] observations were deleted due to missing variables.

**Table S4. Baseline characteristics stratified by rhythm control intervention.**

| Characteristic                             | No intervention<br>n=1655 | PVI<br>n=221 | ECV<br>n=107 | Amiodarone<br>n=101 | >1 intervention<br>n=188 | p-value |
|--------------------------------------------|---------------------------|--------------|--------------|---------------------|--------------------------|---------|
| Age [years ]                               | 71 ± 10                   | 62 ± 10      | 68 ± 10      | 73 ± 6              | 66 ± 9                   | <0.001  |
| Female sex, No. (%)                        | 491 (29.7)                | 71 (32.1)    | 32 (29.9)    | 35 (34.7)           | 56 (29.8)                | 0.812   |
| Body mass index [kg/m <sup>2</sup> ]       | 26.9 ± 4.6                | 26.4 ± 3.9   | 27.6 ± 4.3   | 27.6 ± 4.6          | 27.8 ± 4.3               | <0.001  |
| Heart rate [beats/min]                     | 65 [58; 75]               | 63 [54; 72]  | 68 [60; 82]  | 66 [57; 73]         | 68 [58; 79]              | 0.006   |
| Systolic blood pressure [mmHg]             | 134 ± 18                  | 134 ± 18     | 134 ± 20     | 136 ± 19            | 135 ± 20                 | 0.025   |
| History of coronary heart disease, No. (%) | 409 (24.7)                | 20 (9.1)     | 23 (21.5)    | 28 (27.7)           | 21 (11.2)                | <0.001  |
| History of stroke/TIA, No. (%)             | 375 (17.9)                | 23 (8.4)     | 30 (17.8)    | 20 (19.8)           | 23 (10.1)                | <0.001  |
| History of hypertension, No. (%)           | 1096 (66.2)               | 105 (47.5)   | 72 (67.3)    | 80 (79.2)           | 121 (64.4)               | <0.001  |
| History of heart failure, No. (%)          | 279 (16.9)                | 12 (5.4)     | 24 (22.4)    | 21 (20.8)           | 29 (15.4)                | <0.001  |
| History of diabetes mellitus, No. (%)      | 224 (13.5)                | 15 (6.8)     | 20 (18.7)    | 13 (12.9)           | 17 (9.0)                 | 0.008   |
| History of renal failure, No. (%)          | 264 (16.0)                | 5 (2.3)      | 19 (17.8)    | 19 (18.8)           | 14 (7.5)                 | <0.001  |
| History of hyperthyroidism, No. (%)        | 66 (4.0)                  | 11 (5.0)     | 7 (6.5)      | 3 (3.0)             | 9 (4.8)                  | 0.646   |
| Current Smoker, No. (%)                    | 129 (7.8)                 | 27 (12.2)    | 10 (9.4)     | 11 (11.1)           | 12 (6.4)                 | 0.133   |
| Regular physical activity, No. (%)         | 834 (50.5)                | 144 (65.5)   | 64 (59.8)    | 56 (56.6)           | 108 (57.5)               | <0.001  |
| AF related symptoms, No. (%)               | 1105 (68.1)               | 207 (93.7)   | 79 (73.8)    | 73 (73.7)           | 153 (81.4)               | <0.001  |

TIA=transient ischaemic attack; p-values were based on Chi-squared or Kruskal Wallis tests as appropriate

**Table S5. Factors associated with rhythm control interventions among patients without a history of pulmonary vein isolation and/or electrical cardioversion.**

| Characteristic<br>n=1221           | HR (95% CI)       | p-value | HR (95% CI)        | p-value |
|------------------------------------|-------------------|---------|--------------------|---------|
|                                    | age/sex adj.      |         | multivariable adj. |         |
| Age                                | 0.83 [0.79; 0.87] | <0.001  | 0.86 [0.81; 0.91]  | <0.001  |
| Female Sex                         | 1.11 (0.86; 1.43) | 0.440   | 0.99 [0.76; 1.30]  | 0.953   |
| BMI                                | 1.00 [0.98; 1.03] | 0.975   | 1.01 [0.98; 1.04]  | 0.474   |
| Heart Rate                         | 1.04 [1.01; 1.08] | 0.014   | 1.05 [1.02; 1.09]  | 0.005   |
| Systolic blood pressure            | 1.03 [1.00; 1.07] | 0.073   | 1.04 [1.00; 1.08]  | 0.038   |
| History of diabetes                | 0.78 [0.53; 1.17] | 0.235   | 0.84 [0.55; 1.28]  | 0.412   |
| History of coronary artery disease | 0.62 [0.44; 0.89] | 0.008   | 0.69 [0.48; 0.99]  | 0.044   |
| History of hypertension            | 1.05 [0.80; 1.39] | 0.705   | 1.06 [0.80; 1.42]  | 0.682   |
| History of heart failure           | 0.94 [0.64; 1.38] | 0.752   | 1.21 [0.81; 1.81]  | 0.361   |
| History of stroke/TIA              | 0.76 [0.54; 1.07] | 0.1118  | 0.76 [0.53; 1.08]  | 0.125   |
| History of hyperthyroidism         | 1.21 [0.57; 2.57] | 0.618   | 1.27 [0.59; 2.70]  | 0.542   |
| History of renal failure           | 0.82 [0.54; 1.24] | 0.352   | 0.90 [0.58; 1.39]  | 0.629   |
| Regular physical activity          | 1.58 [1.23; 2.03] | <0.001  | 1.68 [1.29; 2.18]  | <0.001  |
| Current smoking                    | 0.93 [0.60; 1.44] | 0.744   | 1.06 [0.68; 1.65]  | 0.815   |
| Paroxysmal AF                      | 0.81 [0.58; 1.13] | 0.218   | 0.80 [0.57; 1.13]  | 0.208   |
| AF related symptoms at baseline    | 1.81 [1.28; 2.57] | <0.001  | 1.78 [1.25; 2.54]  | 0.001   |

Data are hazard ratios (HR) (95% confidence intervals [CI]) based on Cox regression models.

Rhythm control intervention was defined as either pulmonary vein isolation, electrical cardioversion and/or new amiodarone.

Age per 5 years increase; Heart Rate per 5 beats/min increase, Systolic blood pressure per 5mmHg increase; Multivariable models included all variables from the table (age, sex, BMI, heart rate, systolic blood pressure, history of diabetes, history of coronary artery disease, history of hypertension, history of heart failure, history of stroke /TIA, history of hyperthyroidism, history of renal failure, regular physical activity, current smoking, paroxysmal AF, AF related symptoms).

A maximum of 32 (2.6%) observations were deleted due to missing predictor variables
